# Supplementary material for: Wheat Stem Rust Detection and Race Characterization in Tunisia
Source: MDPI journal article supplement (doi:10.3390/plants12030552), 2023-01-25
Supplement: s1 [file s1]

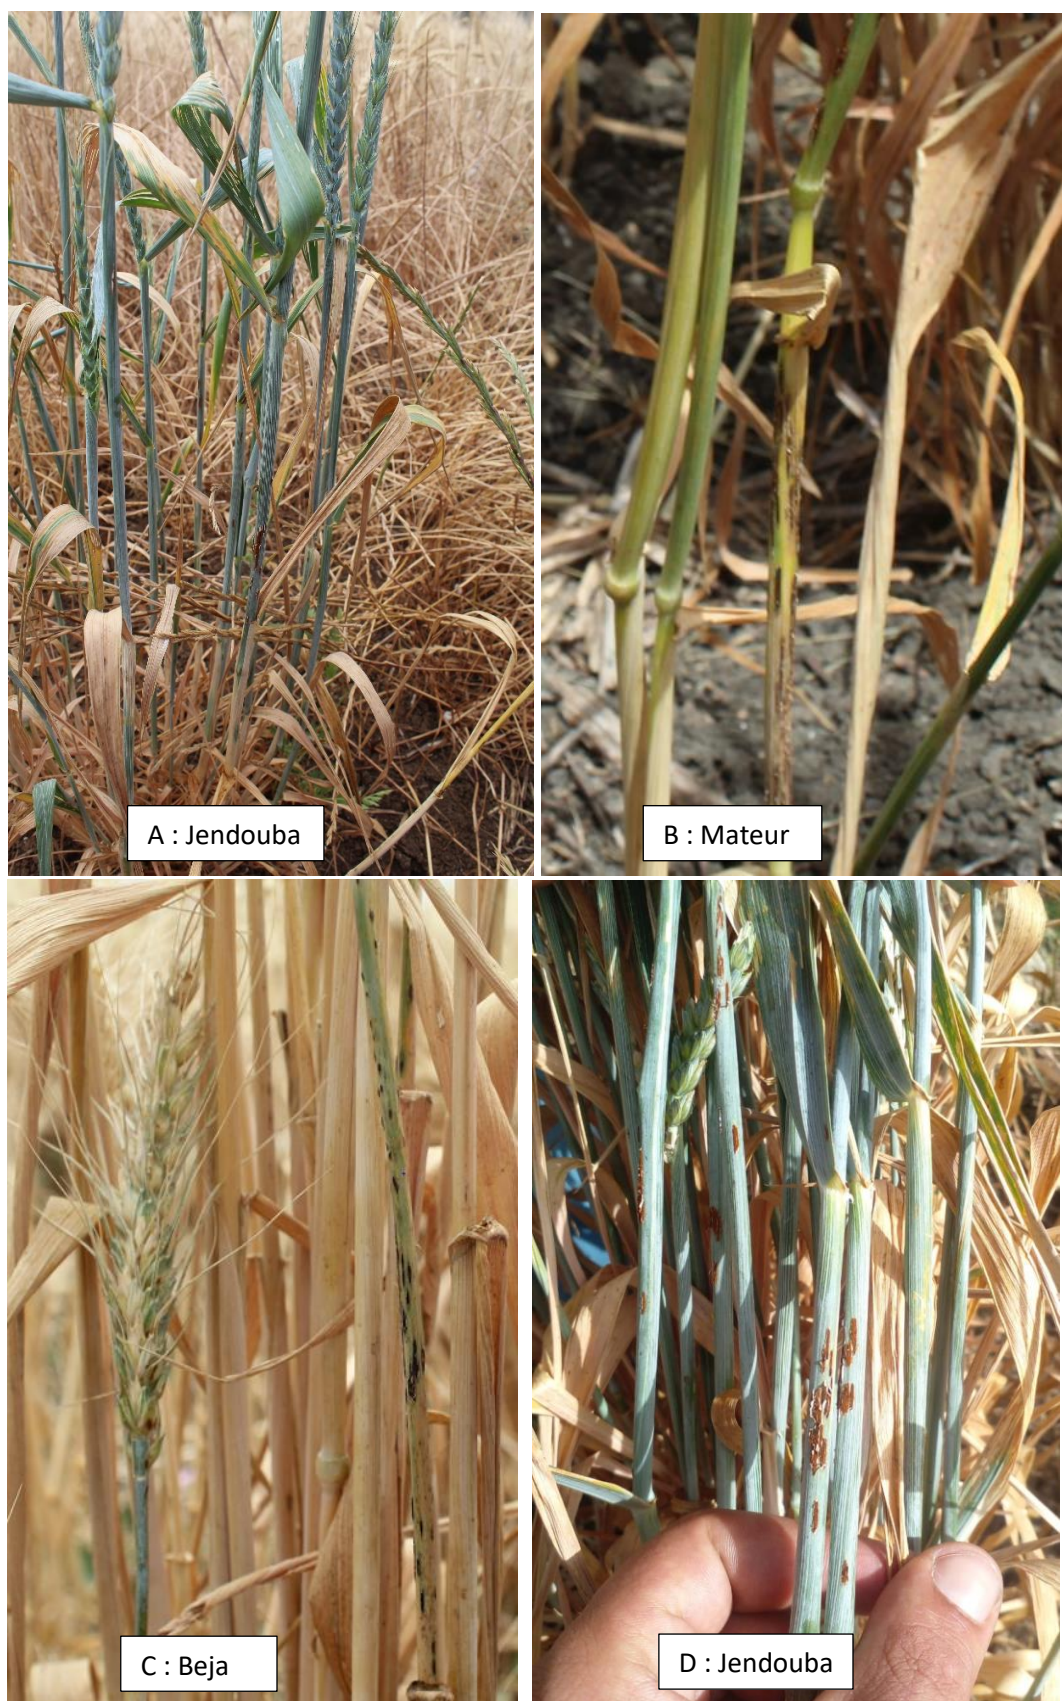

**Figure S1:** Stem rust disease symptoms detected in 2021 (A, B and C) and 2022 (D) cropping seasons at different locations in Tunisia within the trap plots.
